# Supplementary material for: Calycosin-7-O-β-Glucoside Isolated from Astragalus membranaceus Promotes Osteogenesis and Mineralization in Human Mesenchymal Stem Cells
Source: MDPI journal article supplement (doi:10.3390/ijms222111362), 2021-10-21

## Supplementary Figure Legends

**Supplementary Figure 1.** Effects of Caly on the osteogenesis of pre-osteoblasts committed to the osteoblast lineages. **(A)** Cell migration was measured by the Wound healing assay. The migrated cells were visualized under a light microscope. Scale bar: 100  $\mu\text{m}$ . **(B)** The line graph shows migration rate (%) normalized to the control. **(C)** The ALP staining was observed at 7 days using a scanner (upper) and colorimetric detector (middle). ALP-positively expressing cells were visualized under a light microscope (bottom). Scale bar: 50  $\mu\text{m}$ . **(D)** ALP activity was quantitatively measured at 7 days using a spectrophotometer. Data are expressed as the mean  $\pm$  S.E.M. from three separate experiments (\* $p < 0.05$  compared to the control, and #  $p < 0.05$  compared to OS).

**Supplementary Figure 2.** Effects of Caly on the RUNX2 expression of pre-osteoblasts committed to the osteoblast lineages. **(A)** RUNX2 and  $\beta$ -actin expressions were analyzed using western blot analysis at 2 days. The bar graph shows relative RUNX2 level (%) normalized to the control (left). **(B)** RUNX2 expression in nucleus was measured at 2 days using immunofluorescence. RUNX2 (red color), nuclear marker DAPI (blue color), Merged (purple color). Scale bar: 50  $\mu\text{m}$ . Data are expressed as the mean  $\pm$  S.E.M. from three separate experiments (\* $p < 0.05$  compared to the control, and #  $p < 0.05$  compared to OS).

**A**

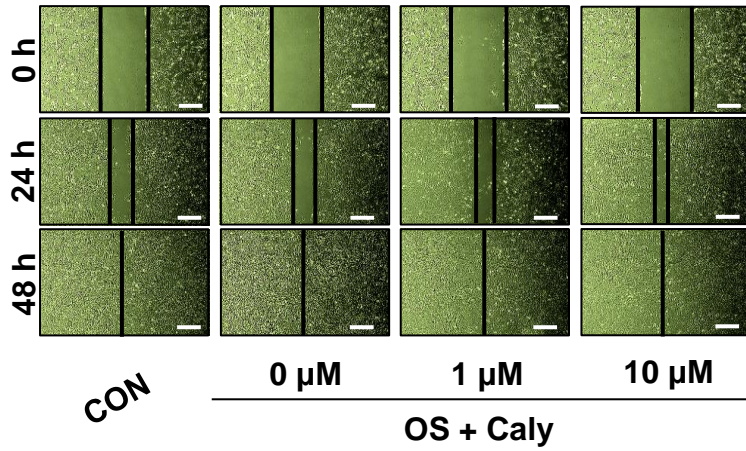

**B**

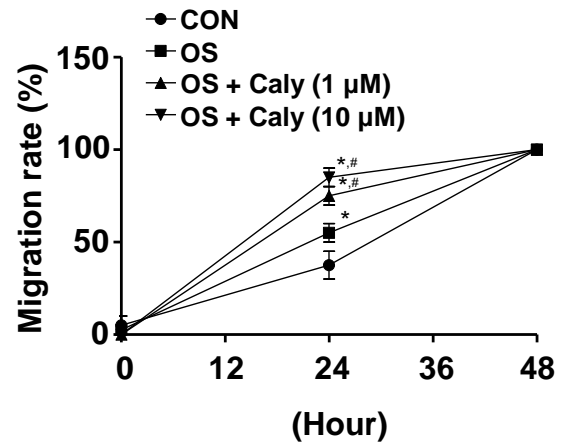

**C**

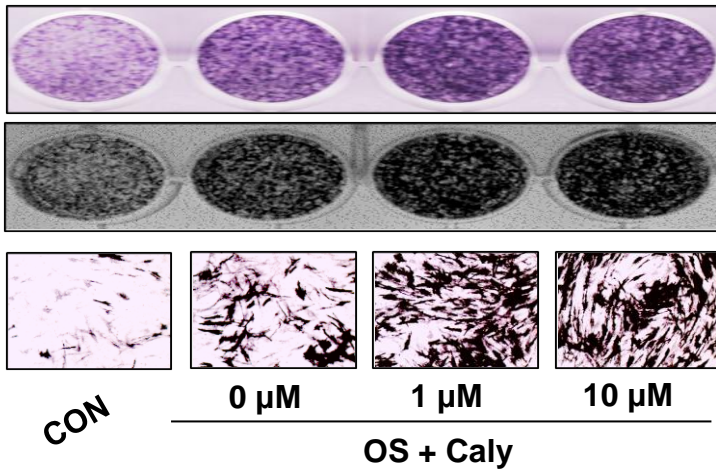

**D**

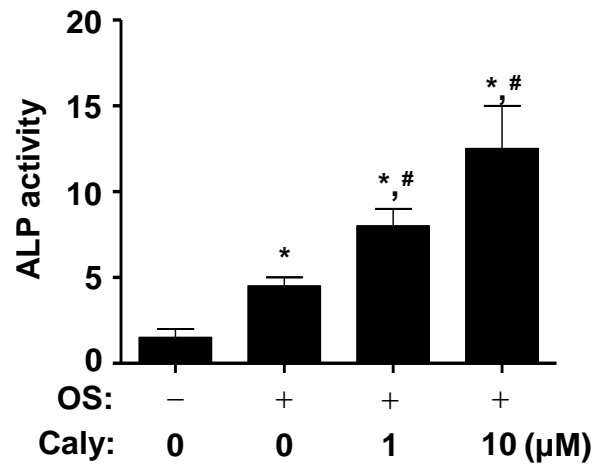

**A**

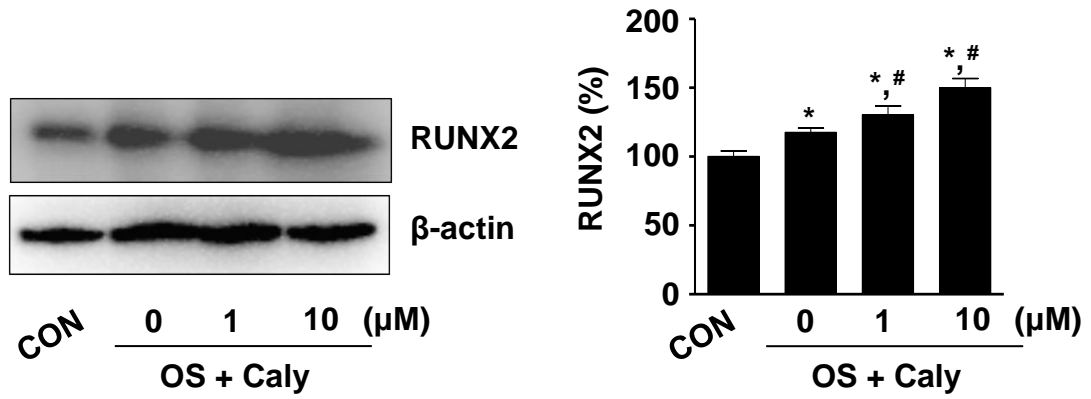

**B**

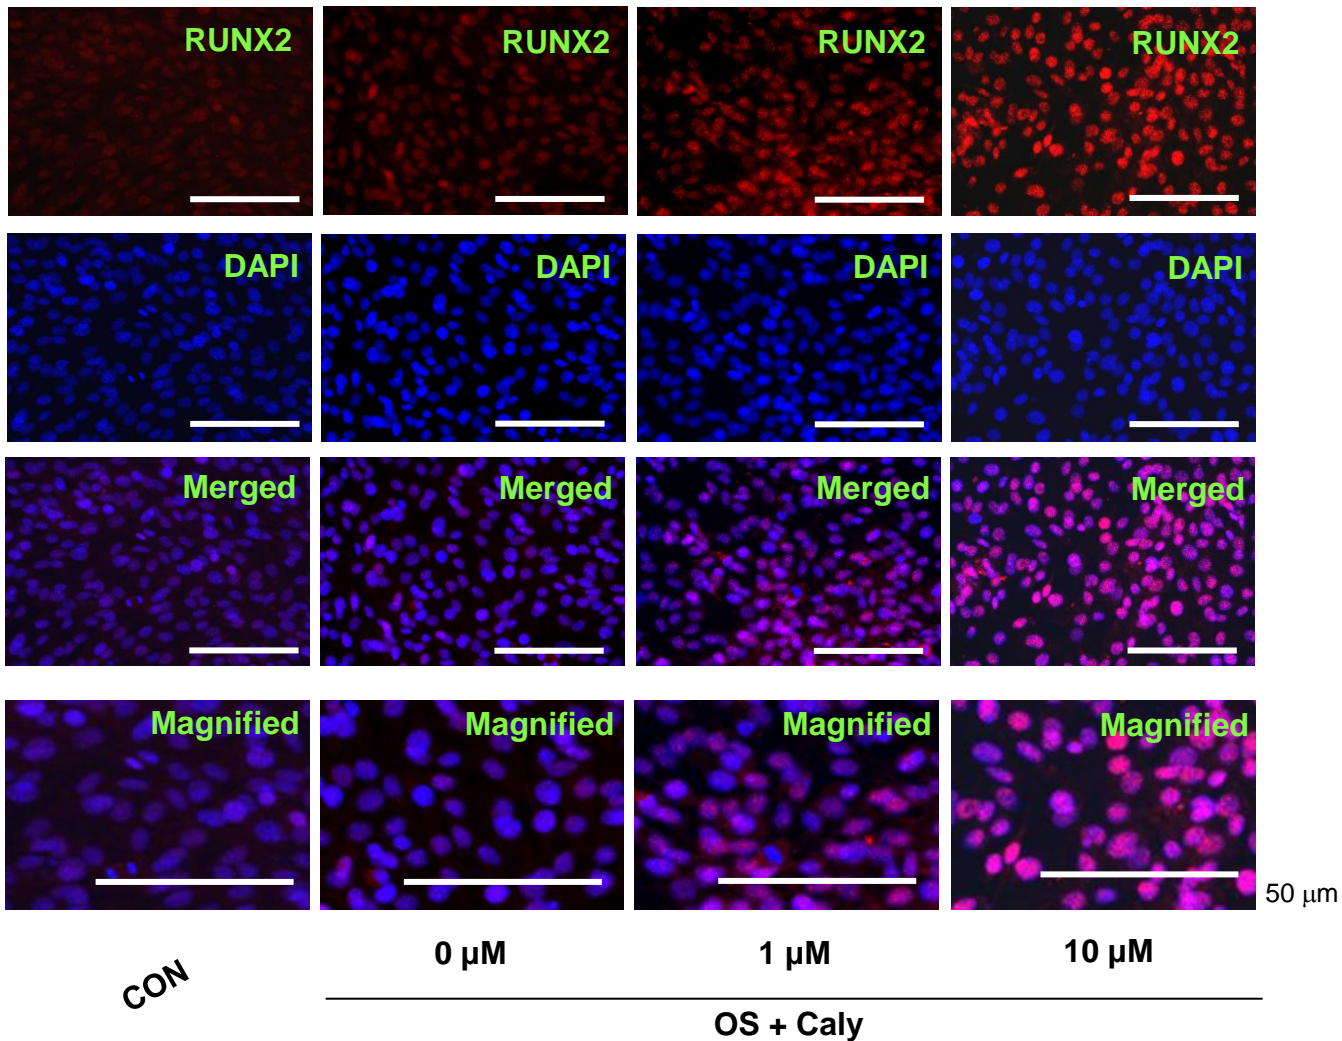

Supplement: s1 [file s1]
